# Supplementary material
Source: MDPI journal article supplement (https://www.mdpi.com/2079-9292/11/23/3973)
Supplement: s1 [file s1]

## Supplementary Material

### The Characteristics of the Second and Third Virtual Cathodes in an Axial Vircator for the Generation of High-Power Microwaves

Sohail Mumtaz, and Eun Ha Choi

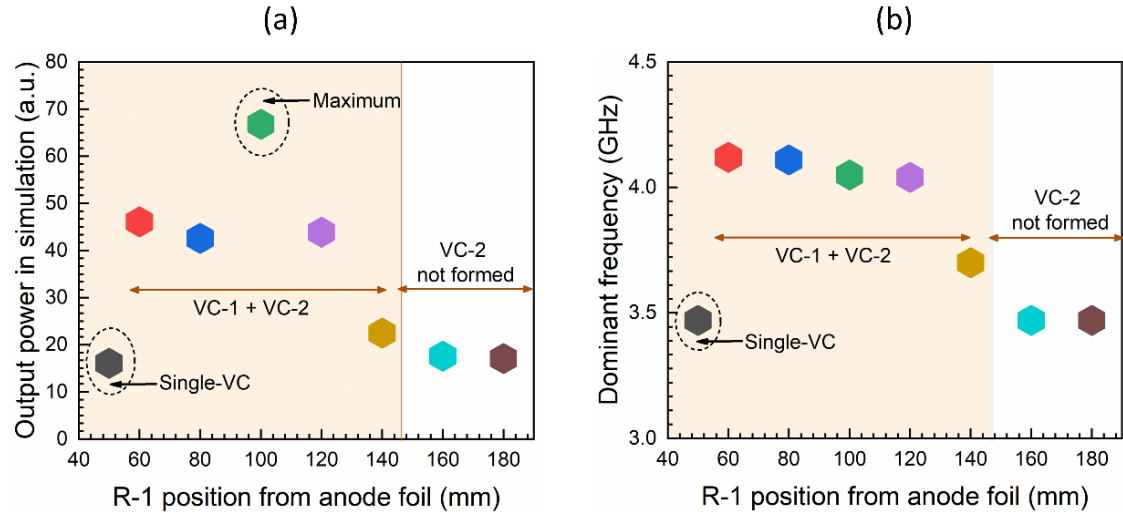

Figure S1. (a) The qualitative analysis of the output power when changing the position of R-1 and formed second VC. (b) Main oscillating frequency in simulation with single and two-VCs. The power enhancing is maximum with two VCs, when R-1 was 100 mm from anode and the frequency is 4 GHz.

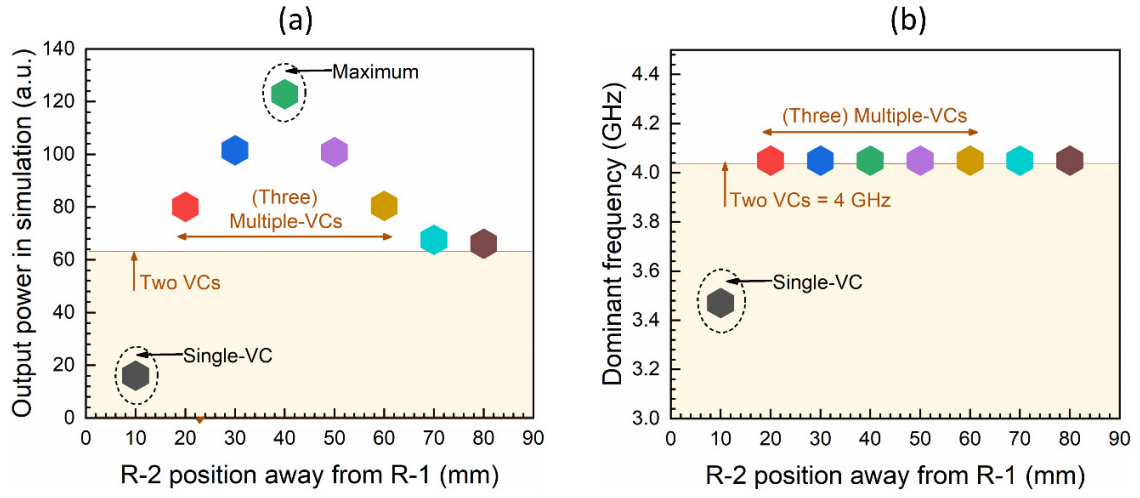

Figure S2. (a) The qualitative analysis of the output power when changing the position of R-2 and formed three or multiple-VCs. (b) Main oscillating frequency in simulation with single and multiple-VCs. The power enhancing is maximum with two VCs, when R-2 was 40 mm from R-1 and the frequency was determined to be 4 GHz.

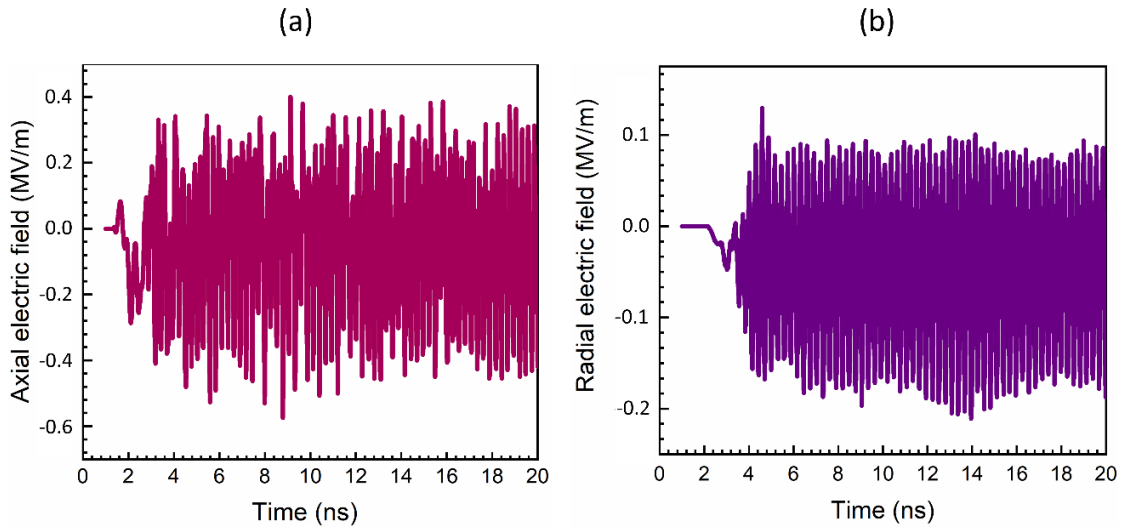

Figure S3. The electric field distribution of conventional VCO obtained in simulation, where, (a) axial electric field, and (b) radial electric field.
